# Supplementary material for: Porcine circovirus type 2 exploits JNK-mediated disruption of tight junctions to facilitate Streptococcus suis translocation across the tracheal epithelium
Source: PubMed Central journal article supplement (PMC7047418; doi:10.1186/s13567-020-00756-2), 2020-02-27

**ZO-1 (control)**

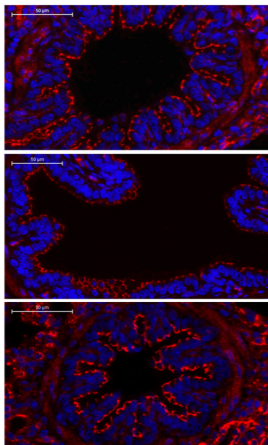

**ZO-1 (PCV2)**

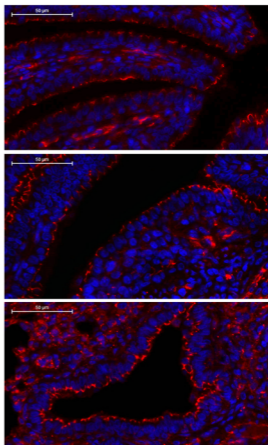

**occludin (control)**

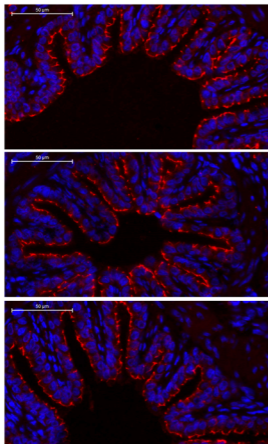

**occludin (PCV2)**

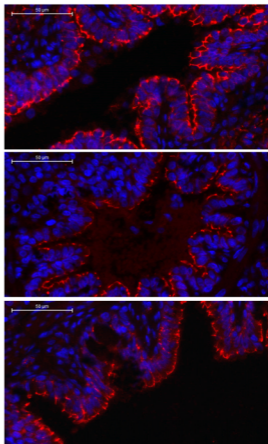

Supplement: 13567_2020_756_MOESM1_ESM.pdf [file 13567_2020_756_MOESM1_ESM.pdf]
